# Supplementary material
Source: MDPI journal article supplement (https://www.mdpi.com/1996-1073/13/17/4319)
Supplement: s1 [file s1]

**Table S1.** Detection processes of fatty acids in CJCO and JNIO.

Step 1: Sample extraction: Add 4 ml of a methanol / CH<sub>2</sub>Cl<sub>2</sub> (1: 3) mixed solution to an appropriate amount of *Jatropha curcas* seed oil and shake well followed by ultrasonication for 10 min at a constant temperature (below 30 °C). Then the mixture was centrifuged at 1800rpm for 10min. The supernatant was collected and the centrifugation was repeated thrice. The solutions were then evaporated to dryness by nitrogen.

Step 2: Saponification of the extract: Add 3 mL of 6% KOH in methanol (6 g KOH / methanol in 118 mL), followed by 10 min sonication and repeat the sonication step 3 times, and kept at room temperature for overnight (close the cap tightly) for alkaline hydrolysis. Add 2 mL of hexane into the mixture and sonicate for 10 min, followed by centrifugation. Discard the upper n-hexane extract, and repeat the centrifugation 3 times. The solution was adjusted to pH <2 using 1 mL of 4N HCl. Then the mixture was extracted three times with 2 mL of n-hexane.

Step 3: Derivation of fatty acids: Transfer the above extract to a glass tube with a cover, air dry with nitrogen. Add 2mL of BF<sub>3</sub>-MeOH, flush the space above the glass tube with nitrogen, and close the cover and kept at 90 °C for 2 h. Sample was allowed to cool at room temperature and add about 1 ml of 5% NaCl solution. Then extract 3 times with 2 ml of n-hexane, and transfer the extract to a 2 mL tubes, air dry with nitrogen.

Step 4: Chromatographic detection and conditions:  
 Column: Thermo TG-5MS 30m x 0.25mm x 0.25µm  
 Heating program: 80 °C starting temperature, hold for 1 minute; 10 °C/ min to 200 °C, 5 °C / min to 225 °C, 2 °C / min to 250 °C, and hold for 5min.  
 Transmission line temperature: 280 °C  
 Ion source temperature: 280 °C  
 Inlet temperature: 290 °C  
 Helium, constant current mode, flow rate: 1.2mL / min.  
 Scanning range: 30–400  
 Injection volume: 1 µL.  
 Detection limit: 0.02 mg/kg

Step 5: Statistical analysis: The fatty acid content was calculated using the external standard and the internal standard.

**Table S2.** Descriptive Statistics of CJCO and JNIO properties.

| Property           | CJCO    |                 | JNIO    |       |
|--------------------|---------|-----------------|---------|-------|
|                    | Average | SD <sup>1</sup> | Average | SD    |
| Water content      | 569.00  | 3.60            | 192.60  | 3.05  |
| Dissipation factor | 0.67    | 0.02            | 0.10    | 0.01  |
| Breakdown voltage  | 55.40   | 1.25            | 72.36   | 1.00  |
| Flash point        | 236.00  | 4.58            | 295.00  | 2.65  |
| Fire point         | 308.00  | 5.29            | 319.66  | 6.02  |
| Viscosity at 40°C  | 32.86   | 0.95            | 32.83   | 0.56  |
| Viscosity at 100°C | 7.38    | 0.05            | 7.46    | 0.08  |
| Pour Point         | -2.33   | 0.58            | -10.00  | 1.00  |
| Relative Density   | 0.91    | 0.004           | 0.91    | 0.007 |
| Total acid content | 9.34    | 0.06            | 0.012   | 0.001 |

<sup>1</sup> SD: Standard Deviation**Table S3.** ANOVA of differences in physical and chemical properties between CJCO and JNIO.

| Property             | SS          | df | MS      | F         | P-value                |
|----------------------|-------------|----|---------|-----------|------------------------|
| **Water content      | 212,440.167 | 1  | 212,440 | 19,024.49 | 1.657×10 <sup>-8</sup> |
| **Dissipation factor | 0.48166667  | 1  | 0.4816  | 1806.25   | 1.832×10 <sup>-6</sup> |
| **Breakdown voltage  | 431.801667  | 1  | 431.80  | 335.59    | 5.223×10 <sup>-5</sup> |
| **Flash point        | 5221.5      | 1  | 5221.5  | 372.96    | 4.237×10 <sup>-5</sup> |
| Fire point           | 204.166667  | 1  | 204.16  | 6.34      | 0.065                  |
| Viscosity at 40 °C   | 0.00201667  | 1  | 0.0020  | 0.0033    | 0.957                  |
| Viscosity at 100 °C  | 0.00921984  | 1  | 0.0092  | 1.8948    | 0.241                  |
| **Pour Point         | 88.1666667  | 1  | 88.166  | 132.25    | 3.264×10 <sup>-4</sup> |
| Relative Density     | 0           | 1  | 0       | 0         | 1                      |
| **Total acid content | 130.56402   | 1  | 130.56  | 72488     | 1.142×10 <sup>-9</sup> |

\*\* indicates that the difference is extremely significant.

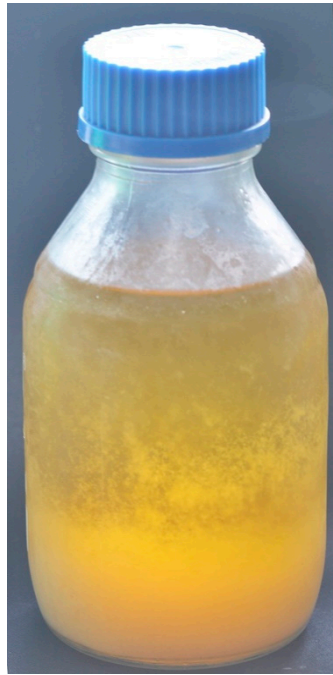

Figure S1. The *Jatropha curcas* seed oil treated at 4 °C for 48 h (show the precipitated oils).

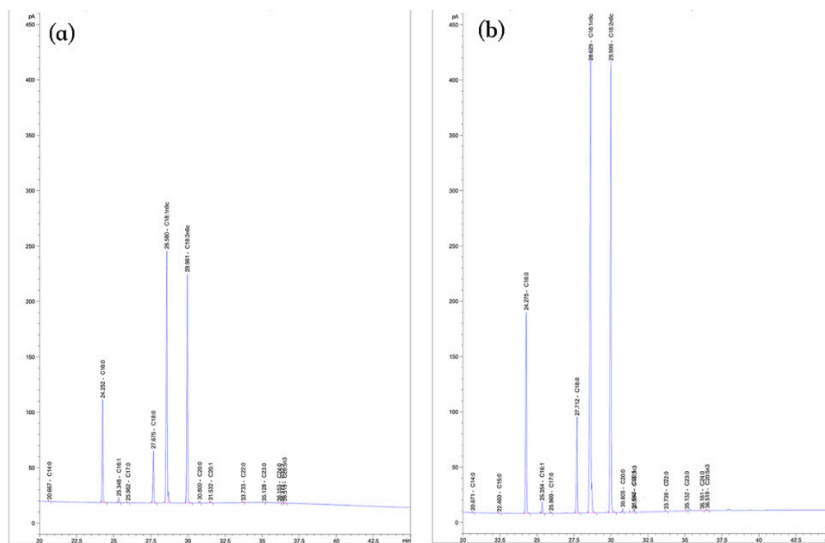

Figure S2. Mass spectrum of fatty acid analysis in CJCO and JNIO (a: CJCO, b: JNIO).
